# Supplementary material for: Carbon dioxide conversion to methanol on a PdCo bimetallic catalyst
Source: Royal Society of Chemistry journal article supplement (doi:10.1039/d3cp05146c), 2024-01-01
Supplement: d3cp05146c1.pdf [file d3cp05146c1.pdf]

## Electronic Supplementary Information

### Carbon dioxide conversion to methanol on PdCo bimetallic catalyst

Huynh Tat Thanh,<sup>a,b,c</sup> Ong Kim Le,<sup>a,b</sup> Viorel Chihaiia,<sup>d</sup> Do Ngoc Son,<sup>a,b,\*</sup>

<sup>a</sup> Ho Chi Minh City University of Technology (HCMUT), 268 Ly Thuong Kiet Street, District 10, Ho Chi Minh City, Vietnam. E-mail: dnson@hcmut.edu.vn.

<sup>b</sup> Vietnam National University Ho Chi Minh City, Linh Trung Ward, Ho Chi Minh City, Vietnam.

<sup>c</sup> An Giang University, VNU-HCM, 18 Ung Van Khiem street, Dong Xuyen ward, Long Xuyen city, An Giang province.

<sup>d</sup> Institute of Physical Chemistry "Ilie Murgulescu" of the Romanian Academy, Splaiul Independentei 202, Sector 6, 060021 Bucharest, Romania.

Table S1. Bond length of intermediates

| No. | Intermediate                                                     | C-O1 | C-O2 | C-H1 | C-H2 | C-H3 | CO1-H3 | CO2-H4 |
|-----|------------------------------------------------------------------|------|------|------|------|------|--------|--------|
| 1   | CO <sub>2</sub> <sup>*</sup>                                     | 1.18 | 1.18 |      |      |      |        |        |
| 2   | COOH <sup>*</sup>                                                | 1.24 | 1.36 |      |      |      | 0.99   |        |
| 3   | HCOO <sup>*</sup>                                                | 1.27 | 1.27 | 1.11 |      |      |        |        |
| 4   | HCOOH <sup>*</sup>                                               | 1.22 | 1.35 | 1.11 |      |      | 0.98   |        |
| 5   | C(OH) <sub>2</sub> <sup>*</sup>                                  | 1.33 | 1.32 |      |      |      | 0.99   | 1.01   |
| 6   | CO <sup>*</sup> ...H <sub>2</sub> O <sup>*</sup>                 | 1.18 |      |      |      |      |        |        |
| 7   | H <sub>2</sub> COO <sup>*</sup>                                  | 1.38 | 1.39 | 1.12 | 1.13 |      |        |        |
| 8   | HCO <sup>*</sup> ...H <sub>2</sub> O <sup>*</sup>                | 1.22 |      | 1.13 |      |      |        |        |
| 9   | COH <sup>*</sup> ...H <sub>2</sub> O <sup>*</sup>                | 1.29 |      |      |      |      | 1.07   |        |
| 10  | H <sub>2</sub> COOH <sup>*</sup>                                 | 1.48 | 1.36 | 1.11 | 1.11 |      | 0.98   |        |
| 11  | HC(OH) <sub>2</sub> <sup>*</sup>                                 | 1.37 | 1.36 | 1.11 |      |      | 0.99   | 0.98   |
| 12  | H <sub>2</sub> CO <sup>*</sup> ...H <sub>2</sub> O <sup>*</sup>  | 1.23 |      | 1.11 | 1.12 |      |        |        |
| 13  | H <sub>2</sub> C(OH) <sub>2</sub> <sup>*</sup>                   | 1.40 | 1.43 | 1.11 | 1.10 |      | 0.98   | 0.99   |
| 14  | HCOH <sup>*</sup> ...H <sub>2</sub> O <sup>*</sup>               | 1.32 |      | 1.14 |      |      | 1.03   |        |
| 15  | H <sub>3</sub> CO <sup>*</sup> ...H <sub>2</sub> O <sup>*</sup>  | 1.41 |      | 1.11 | 1.12 | 1.11 |        |        |
| 16  | H <sub>2</sub> COH <sup>*</sup> ...H <sub>2</sub> O <sup>*</sup> | 1.36 |      | 1.10 | 1.11 |      | 1.01   |        |
| 17  | CH <sub>3</sub> OH <sup>*</sup> ...H <sub>2</sub> O <sup>*</sup> | 1.44 |      | 1.10 | 1.10 | 1.10 |        | 1.00   |

Note: The OH bond lengths in H<sub>2</sub>O are not mentioned. O2 is the oxygen at higher position than O1. H1, H2, H3 in C-H1, C-H2, C-H3 are hydrogen atoms with an increasing of height, respectively. H3, H4 in CO1-H3, CO2-H4 are hydrogen atoms directly bonding to O1 and O2, respectively.

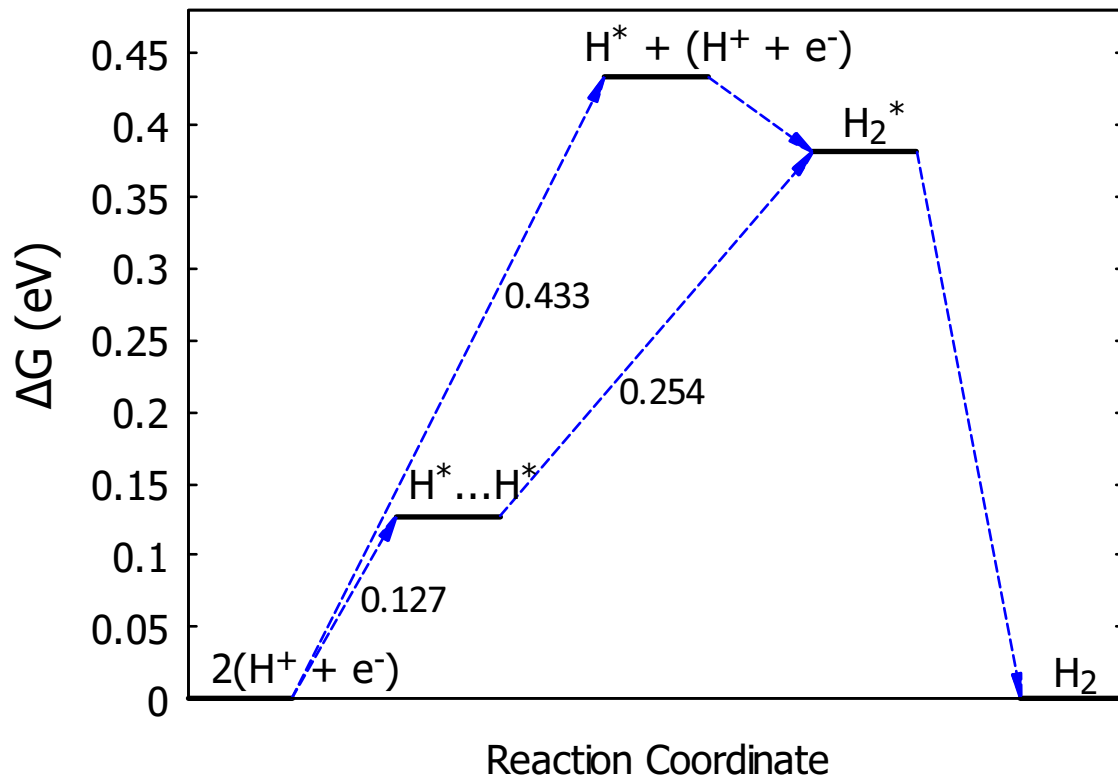

**Figure S1.** The free energy diagram for hydrogen evolution reaction on the PdCo alloy.

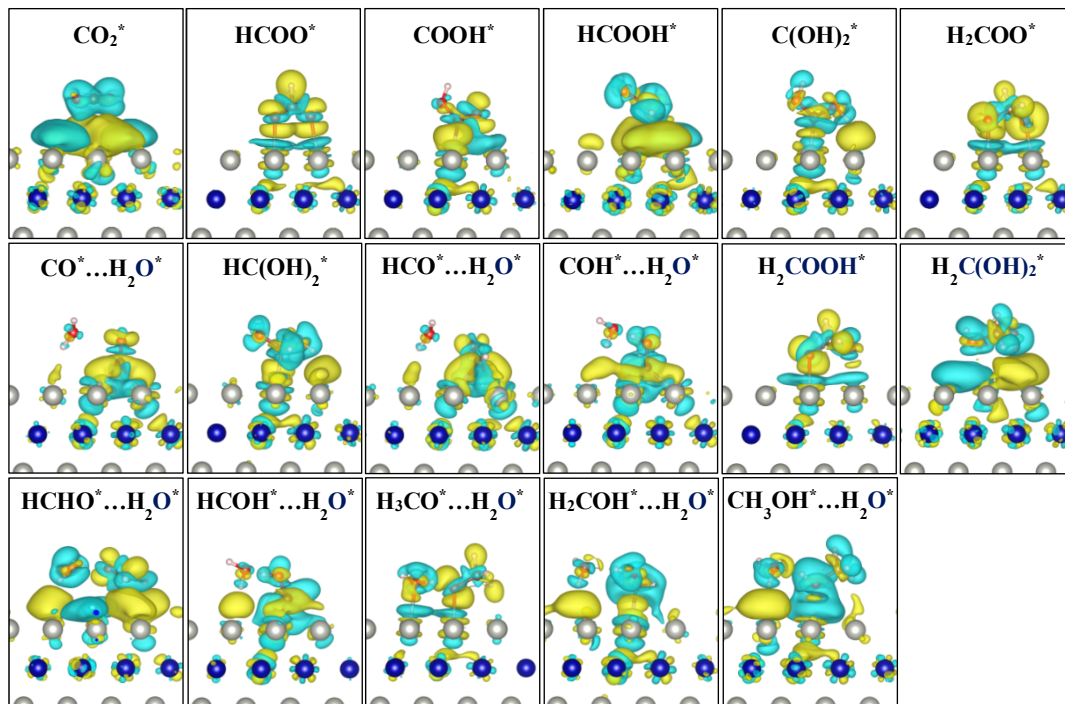

**Figure S2.** The CDD of intermediates. Negative charge accumulation (yellow) and negative charge donation (cyan).

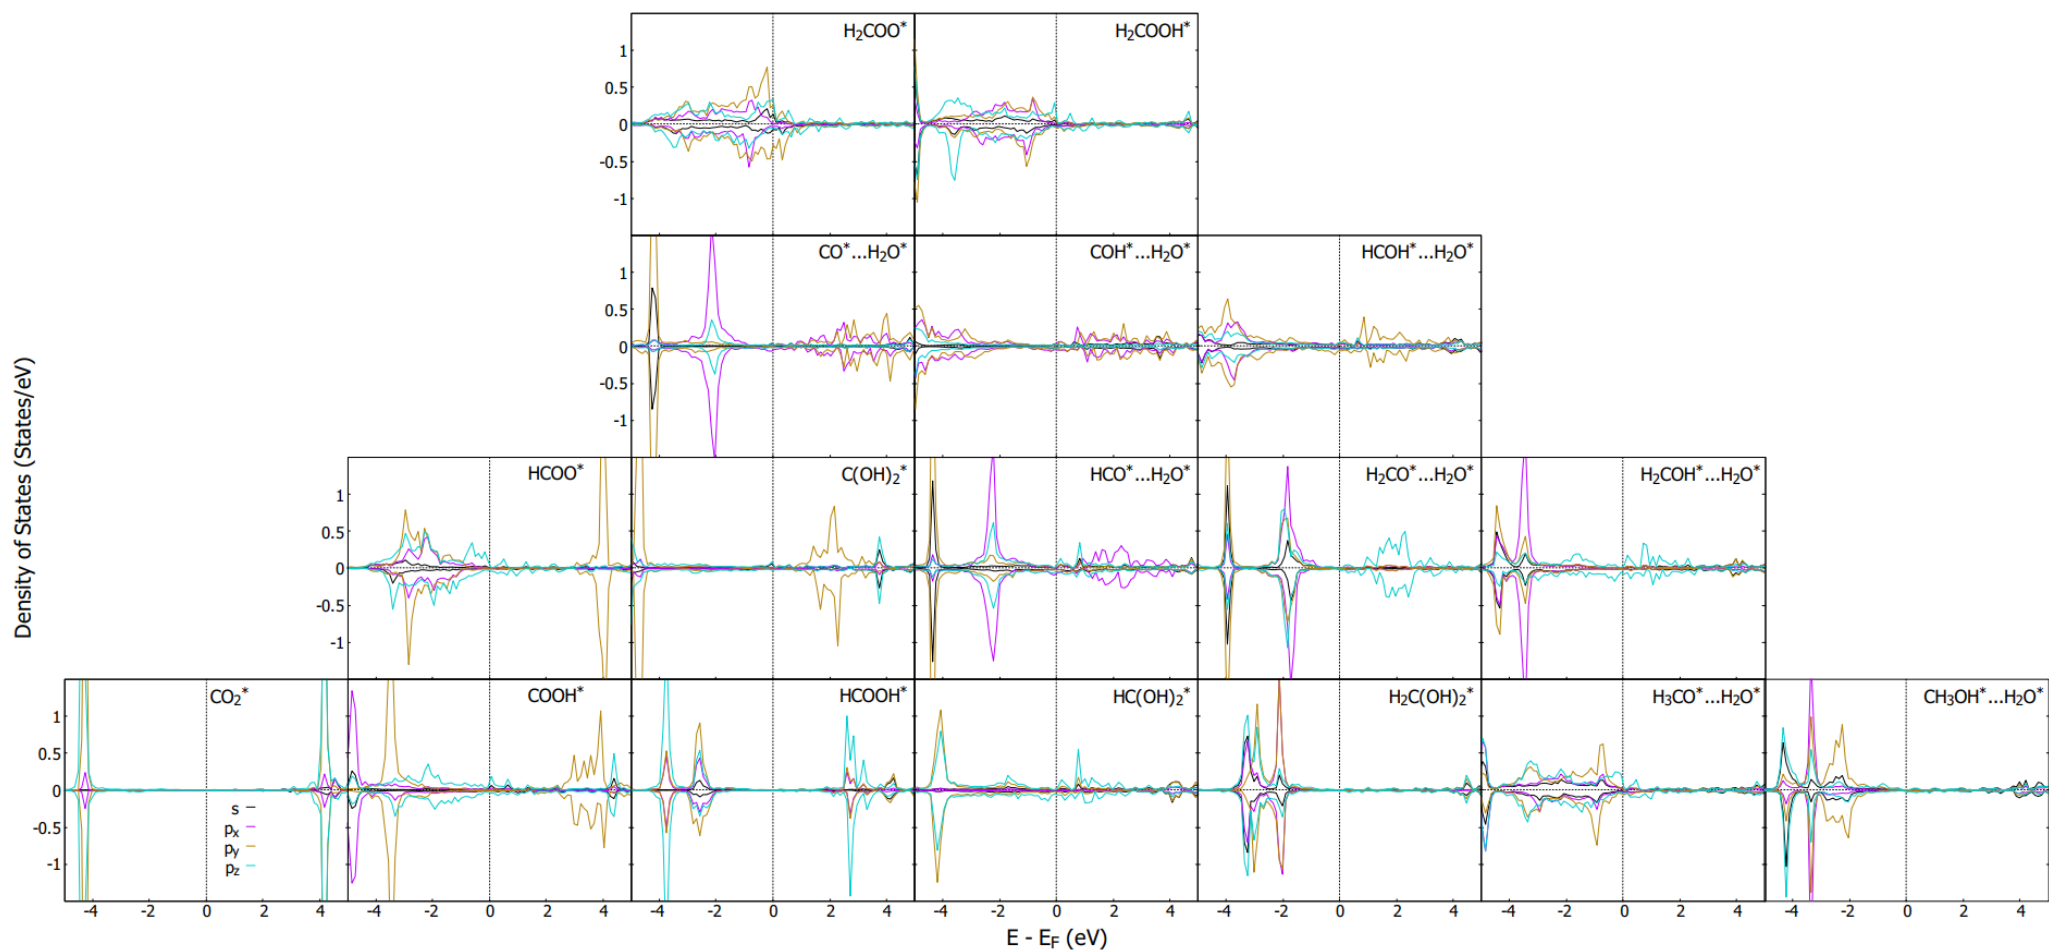

**Figure S3.** The PDOS of intermediates.
